# Supplementary material for: Biomimetic strain-stiffening in fully synthetic dynamic-covalent hydrogel networks
Source: Royal Society of Chemistry journal article supplement (doi:10.1039/d3sc00011g), 2023-01-01
Supplement: d3sc00011g1.pdf [file d3sc00011g1.pdf]

# Biomimetic Strain-Stiffening in Fully Synthetic Dynamic-Covalent Hydrogel Network

*Rachel C. Ollier<sup>†</sup>, Yuanhui Xiang<sup>†</sup>, Adriana M. Yacovelli<sup>†</sup>, Matthew J. Webber<sup>†,\*</sup>*

<sup>†</sup>- Department of Chemical & Biomolecular Engineering, University of Notre Dame

\*- Address Correspondences to: 205 McCourtney Hall, Notre Dame, IN 46556 USA;  
mwebber@nd.edu

## **Table of Contents:**

### **I. Supporting Figures**

**Fig. S1-** 4aPEG-PyPBA structure

**Fig. S2-** 4aPEG-PyPBA/4aPEG-Diol strain sweeps, 2-4 wt%

**Fig. S3-** Strain-stiffening properties of 4aPEG-FPBA/4aPEG-Diol gels upon drying and rehydration

**Fig. S4-** 4aPEG-FPBA/4aPEG-Diol frequency sweeps, pH 6.5-8

**Fig. S5-** 4aPEG-PyPBA/4aPEG-Diol strain sweeps, pH 6.5-7.5

**Fig. S6-** 4aPEG-FPBA/4aPEG-Diol frequency sweeps, pH 6.5

**Fig. S7-** 4aPEG-FPBA/4aPEG-Diol frequency sweeps, pH 7

**Fig. S8-** 4aPEG-FPBA/4aPEG-Diol frequency sweeps, pH 7.5

**Fig. S9-** 4aPEG-FPBA/4aPEG-Diol frequency sweeps, pH 8

**Fig. S10-** 4aPEG-FPBA/4aPEG-Diol frequency sweeps, 5-35°C

I. **Supplemental Data:**

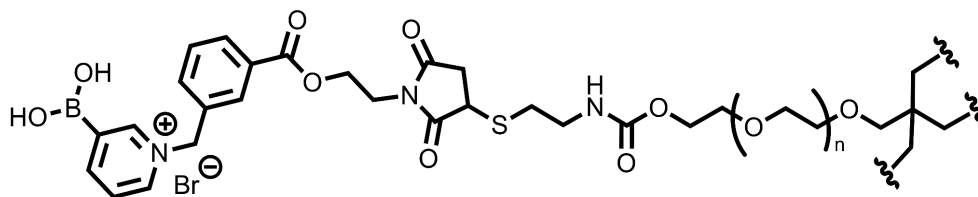

**Fig. S1:** Structure of 4aPEG-PyPBA.

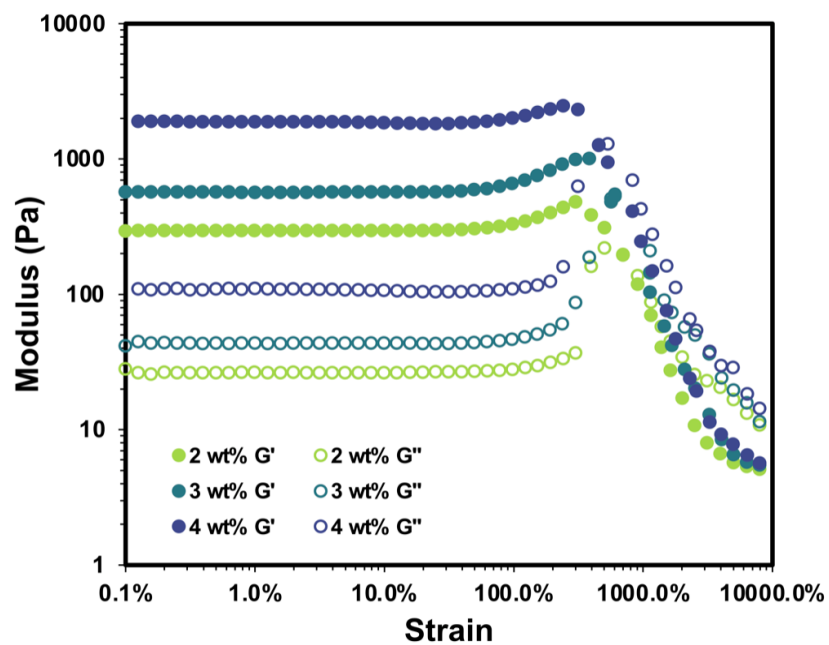

**Fig. S2:** Strain sweeps of 2-4 wt% 4aPEG-PyPBA/4aPEG-Diol hydrogels at 25°C, prepared at pH 7.

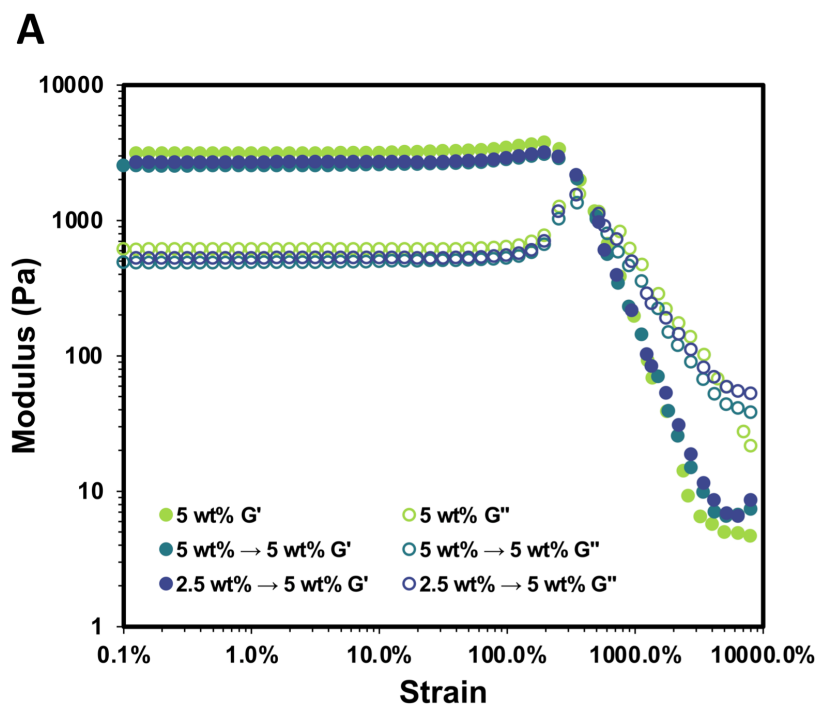

**Fig. S3:** Strain-stiffening behavior of 4aPEG-FPBA/4aPEG-Diol gels upon drying and rehydration. (A) Strain sweeps of a freshly prepared 5 wt% gel, a “5 wt% → 5 wt%” gel prepared at 5 wt% with 150 mM pH 6.5 buffer, lyophilized, and rehydrated to 5 wt% with DI water, and a “2.5 wt% → 5 wt%” gel prepared at 2.5 wt% with 75 mM pH 6.5 buffer, lyophilized, and rehydrated to 5 wt% with DI water. (B) Critical stress and stiffening index of these three gels.

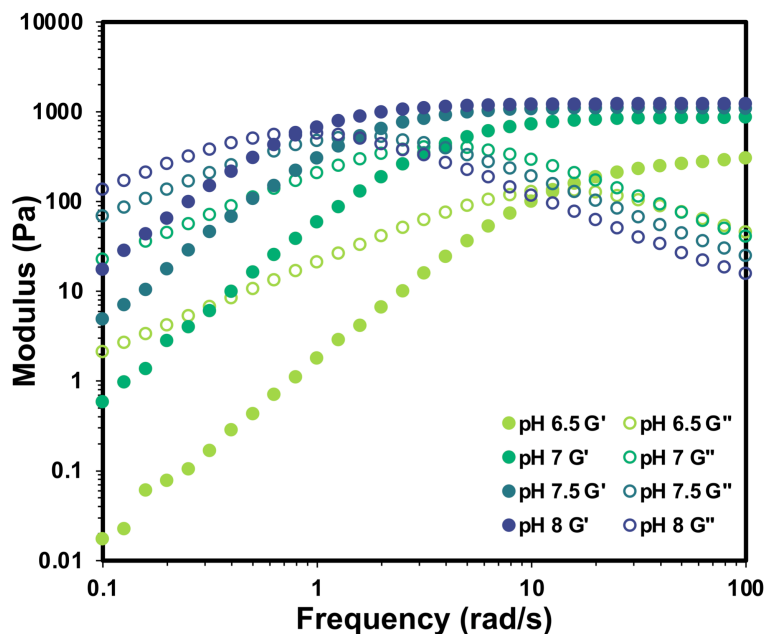

**Fig. S4:** Frequency sweeps of 2.5 wt% 4aPEG-FPBA/4aPEG-Diol hydrogels at 25°C, prepared at pH 6.5, 7, 7.5, and 8.

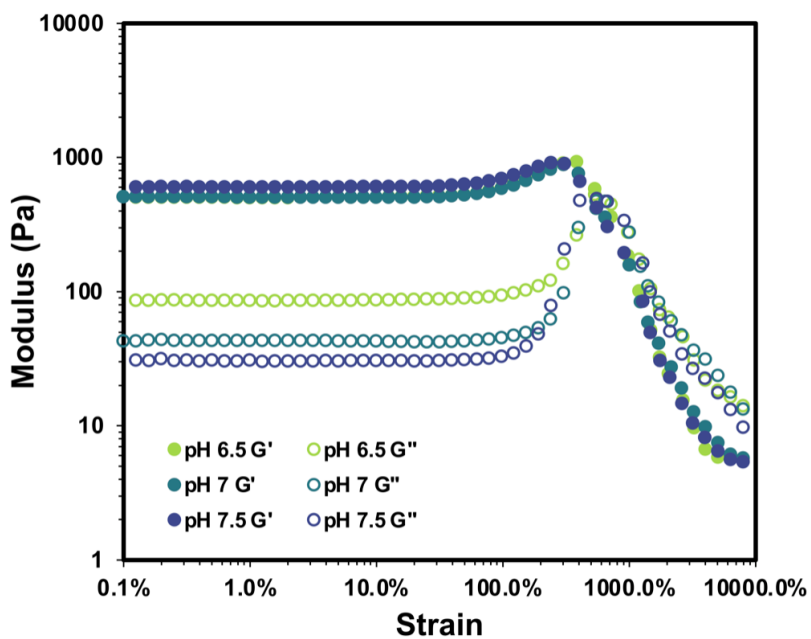

**Fig. S5:** Strain sweeps of 3 wt% 4aPEG-PyPBA/4aPEG-Diol hydrogels at 25°C, prepared at pH 6.5, 7, and 7.5.

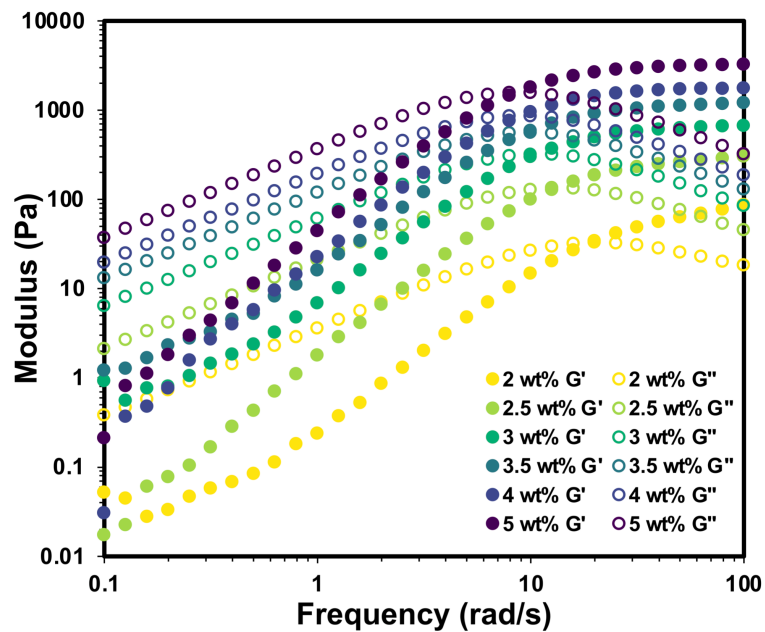

**Fig. S6:** Frequency sweeps of 2-5 wt% 4aPEG-FPBA/4aPEG-Diol hydrogels at 25°C, prepared at pH 6.5.

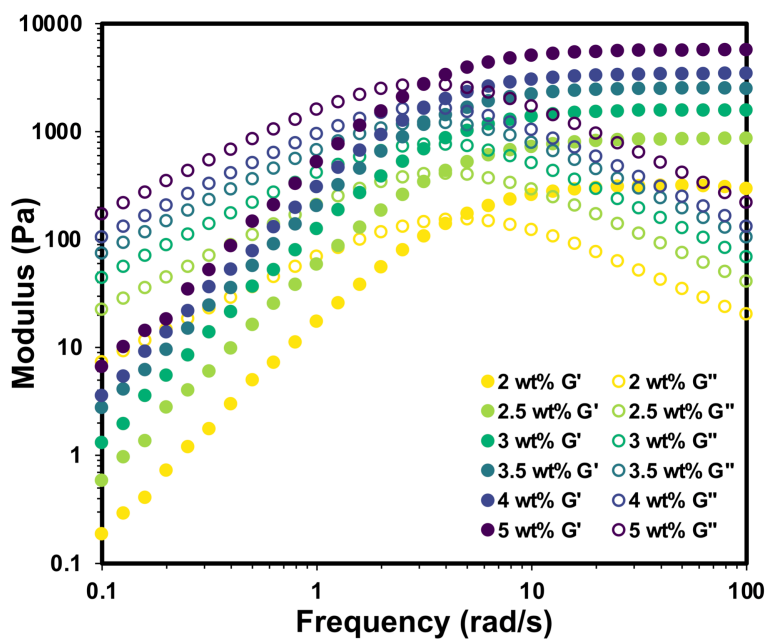

**Fig. S7:** Frequency sweeps of 2-5 wt% 4aPEG-FPBA/4aPEG-Diol hydrogels at 25°C, prepared at pH 7.

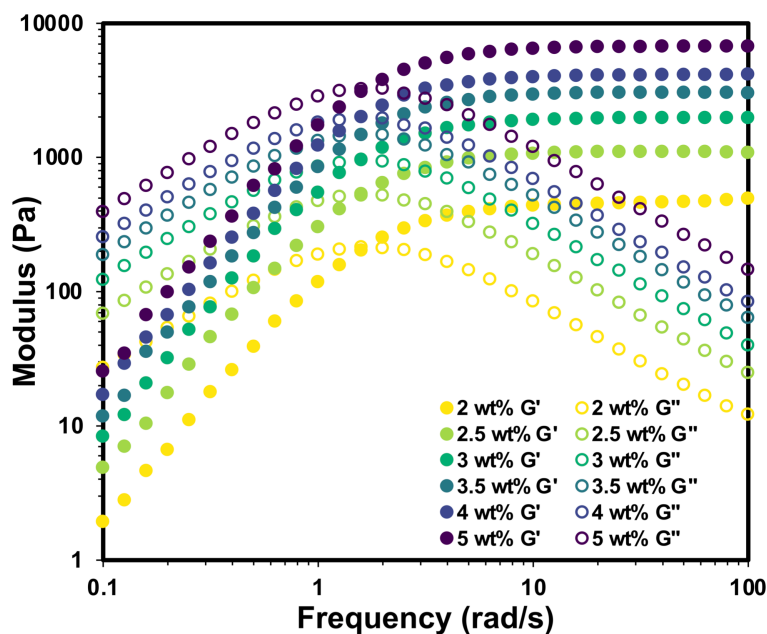

**Fig. S8:** Frequency sweeps of 2-5 wt% 4aPEG-FPBA/4aPEG-Diol hydrogels at 25°C, prepared at pH 7.5.

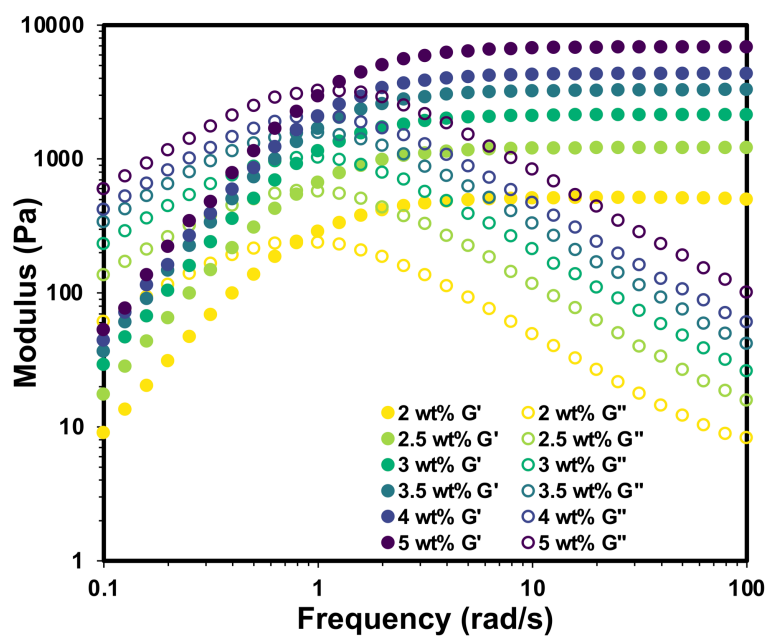

**Fig. S9:** Frequency sweeps of 2-5 wt% 4aPEG-FPBA/4aPEG-Diol hydrogels at 25°C, prepared at pH 8.

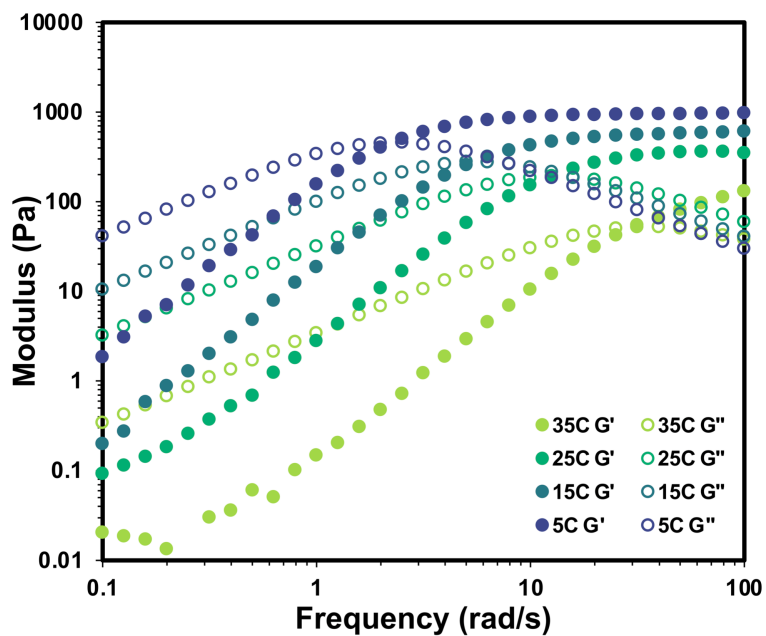

**Fig. S10:** Frequency sweeps of 2.5 wt% 4aPEG-FPBA/4aPEG-Diol hydrogels at 5°C, 15°C, 25°C, and 35°C, prepared at pH 6.5.
